# Supplementary material for: Comparative Transcriptome Analysis Reveals bmo-miR-6497-3p Regulate Circadian Clock Genes during the Embryonic Diapause Induction Process in Bivoltine Silkworm
Source: MDPI journal article supplement (doi:10.3390/insects12080739), 2021-08-18
Supplement: s1 [file s1]

Table S1. Major primer sequences in this study

| Primer name               | Primer sequence (5'-3')                                |
|---------------------------|--------------------------------------------------------|
| RNA5' Adapter             | GTTCAGAGTTCTACAGTCCGACGATC                             |
| RNA3' Adapter             | AGATCGGAAGAGCACACGTCT                                  |
| bmo-miR-6497-3p-F for OE  | <u>CCACTAGTCCAGTGTGGTGGCCAAAAAGGTAATTCCATTCC</u>       |
| bmo-miR-6497-3p-R for OE  | <u>ACTGTGCTGGATATCTGCAGTTTCCCAAGTCCCTCGCTC</u>         |
| bmo-miR-6497-3p-SL primer | <u>CTCAACTGGTGTCTGCTGGAGTCCGGCAATTCAGTTGAGAGACCCGG</u> |
| bmo-miR-6497-3p-F         | <u>ACACTCCAGCTGGGGATGCGGCCCGTGCC</u>                   |
| bmo-miR-6497-3p-R         | TGGTGTCTGCTGGAGTCG                                     |
| U6-F                      | <u>CTCGCTTCGGCAGCACA</u>                               |
| U6-R                      | <u>AACGCTTCACGAATTTGCGT</u>                            |
| Cycle-F                   | GCCAGTCAAGGAGGAGGT                                     |
| Cycle-R                   | AGAGTTCGTGGTGGGAGC                                     |
| Pdp-F                     | GAAGGAGAATATGGGCTTACGG                                 |
| Pdp-R                     | GTGTTGTGCTATGCGGGTG                                    |
| SW22934-F                 | <u>TTCGTACTGCTCTTCTCGT</u>                             |
| SW22934-R                 | <u>CAAAGTTGATAGCAATTCCT</u>                            |
| Cycle 3'UTR-F             | GTCATGTGAAAACCTAGCCTTAGTG                              |
| Cycle 3'UTR-R             | CATATCATCAGATGCTTTACCAGTTAG                            |

†: the solid line indicates the sequence of homology arm primer for constructing overexpression vector, and the dotted line indicates the regular part in primer.

Table S2. Information statistics on mapping with reference genome

| Sample | Total sRNA         | Mapped sRNA       | " + "Mapped sRNA | " - "Mapped sRNA |
|--------|--------------------|-------------------|------------------|------------------|
| BK25   | 13172384 (100.00%) | 11290246 (85.71%) | 6815481 (51.74%) | 4474765 (33.97%) |
| BK15   | 12211015 (100.00%) | 10778240 (88.27%) | 6660938 (54.55%) | 4117302 (33.72%) |
| HP25   | 8595053 (100.00%)  | 7410664 (86.22%)  | 5103721 (59.38%) | 2306943 (26.84%) |
| HP15   | 7543817 (100.00%)  | 6299620 (83.51%)  | 3800764 (50.38%) | 2498856 (33.12%) |
